# Supplementary material
Source: Springer Nature journal article supplement (https://www.springermedizin.de/resource/supplementary/13000_2011_425_MOESM2_ESM.pdf/9624542)

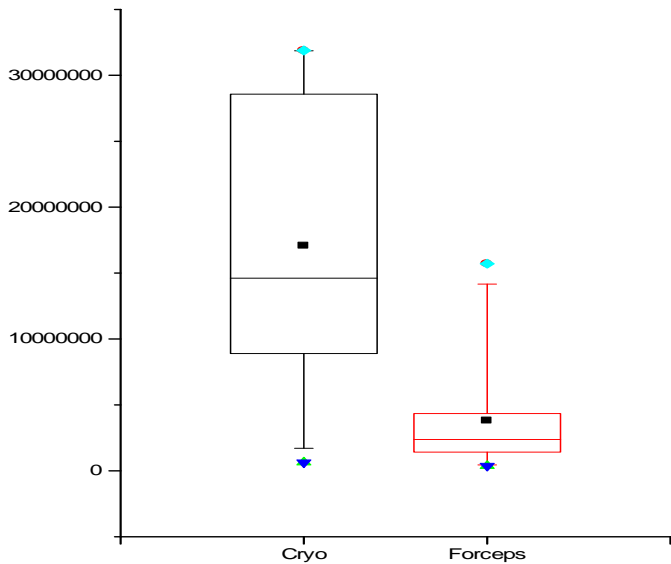

|         | Mean    | MAX    | Min   | P1    | p99    | sd    |
|---------|---------|--------|-------|-------|--------|-------|
| Cryo    | 17.0768 | 31.885 | 0.633 | 0.633 | 31.885 | 10.66 |
| Forceps | 3.799   | 15.713 | 0.366 | 0.366 | 15.713 | 4.027 |

Supplement: MOESM2 [file 9624542]
